# Supplementary figures and images for: Strategies for preparing TiO2/CuS nanocomposites with cauliflower-like protrusions for photocatalytic water purification
Source: Royal Society of Chemistry journal article supplement (doi:10.1039/d2nj00672c), 2022-01-01

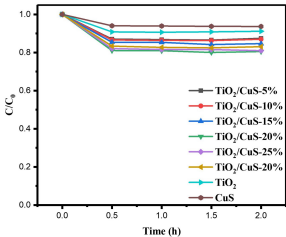

Supplement: d2nj00672c10.pdf [file d2nj00672c10.pdf]

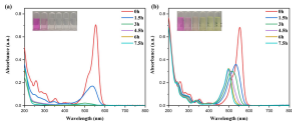

Supplement: d2nj00672c11.pdf [file d2nj00672c11.pdf]

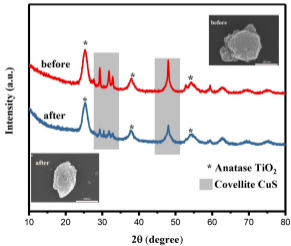

Supplement: d2nj00672c12.pdf [file d2nj00672c12.pdf]

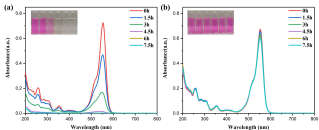

Supplement: d2nj00672c13.pdf [file d2nj00672c13.pdf]

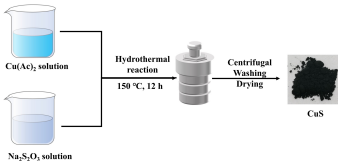

Supplement: d2nj00672c3.pdf [file d2nj00672c3.pdf]

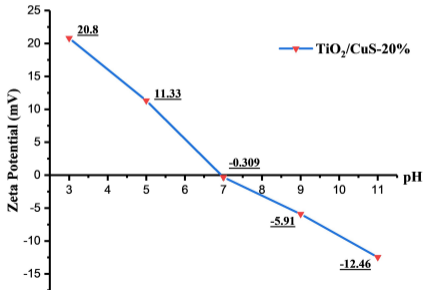

Supplement: d2nj00672c4.pdf [file d2nj00672c4.pdf]

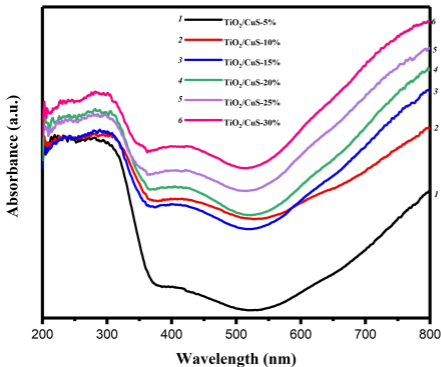

Supplement: d2nj00672c5.pdf [file d2nj00672c5.pdf]

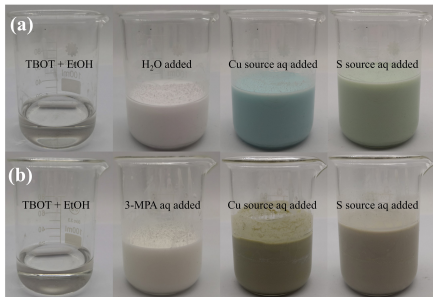

Supplement: d2nj00672c6.pdf [file d2nj00672c6.pdf]

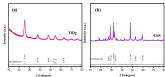

Supplement: d2nj00672c7.pdf [file d2nj00672c7.pdf]

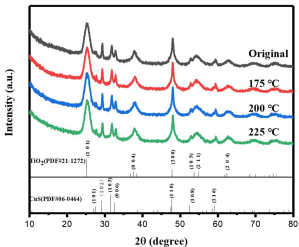

Supplement: d2nj00672c8.pdf [file d2nj00672c8.pdf]

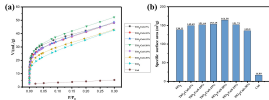

Supplement: d2nj00672c9.pdf [file d2nj00672c9.pdf]
